# Supplementary material
Source: MDPI journal article supplement (https://www.mdpi.com/2673-706X/4/2/8)
Supplement: s1 [file s1]

## Supplementary Materials

**Table S1.** Statistical analyses of the output voltage mappings registered at constant normal forces (CNFs) ranging between 120 nN and 380 nN for the three aspect ratio distributions.

|                                                   | Constant Normal Force (CNF) (nN) | First Distribution (mV) | Second Distribution (mV) | Third Distribution (mV) |
|---------------------------------------------------|----------------------------------|-------------------------|--------------------------|-------------------------|
| Pure GaN NWs                                      | 120                              | $58 \pm 75$             | $242 \pm 58$             | $509 \pm 54$            |
|                                                   | 160                              | $100 \pm 89$            | $373 \pm 55$             | $528 \pm 37$            |
|                                                   | 180                              | $123 \pm 88$            | $306 \pm 88$             | $499 \pm 48$            |
|                                                   | 280                              | $211 \pm 71$            | $407 \pm 58$             | $529 \pm 31$            |
|                                                   | 330                              | --                      | $335 \pm 82$             | $526 \pm 39$            |
|                                                   | 380                              | $250 \pm 42$            | $383 \pm 57$             | $517 \pm 40$            |
| GaN/Al <sub>2</sub> O <sub>3</sub> core-shell NWs | 120                              | $49 \pm 33$             | $182 \pm 53$             | $446 \pm 86$            |
|                                                   | 160                              | $67 \pm 55$             | $289 \pm 74$             | $481 \pm 52$            |
|                                                   | 180                              | $55 \pm 53$             | $243 \pm 67$             | $476 \pm 61$            |
|                                                   | 280                              | $127 \pm 69$            | $318 \pm 63$             | $472 \pm 74$            |
|                                                   | 330                              | $87 \pm 68$             | $332 \pm 60$             | $504 \pm 62$            |
|                                                   | 380                              | --                      | $302 \pm 63$             | $503 \pm 57$            |
